# Supplementary material for: Dysregulations of Key Regulators of Angiogenesis and Inflammation in Abdominal Aortic Aneurysm
Source: MDPI journal article supplement (doi:10.3390/ijms241512087), 2023-07-28
Supplement: s1 [file s1]

## SUPPLEMENTARY FIGURES

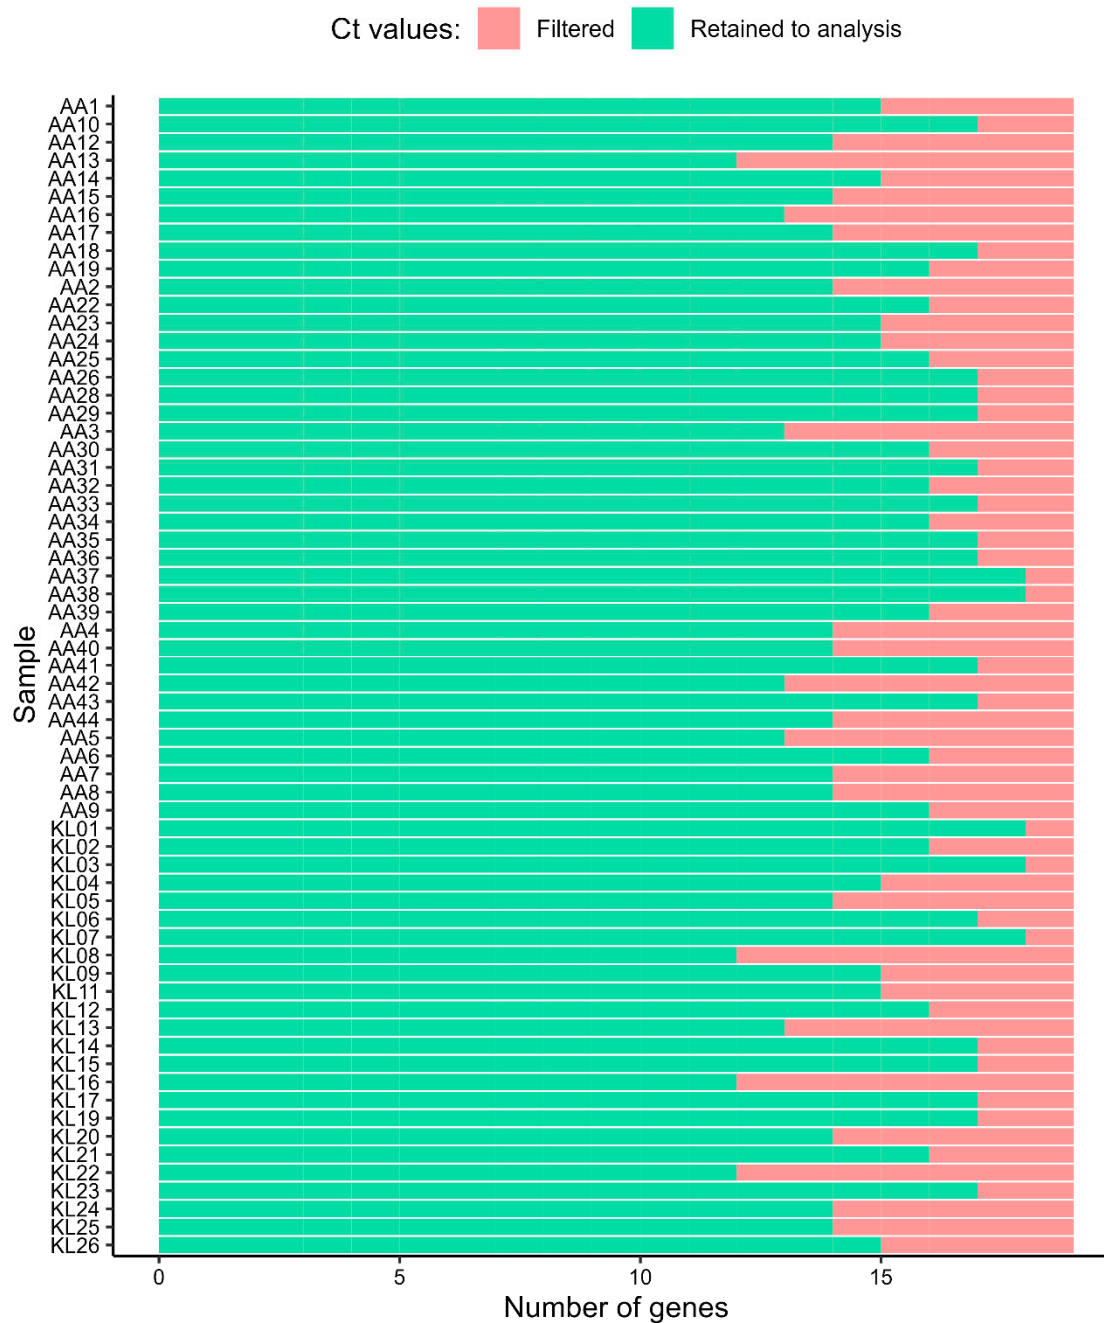

**Figure S1.** The amounts of genes with filtered and retained Ct values in analyzed samples.

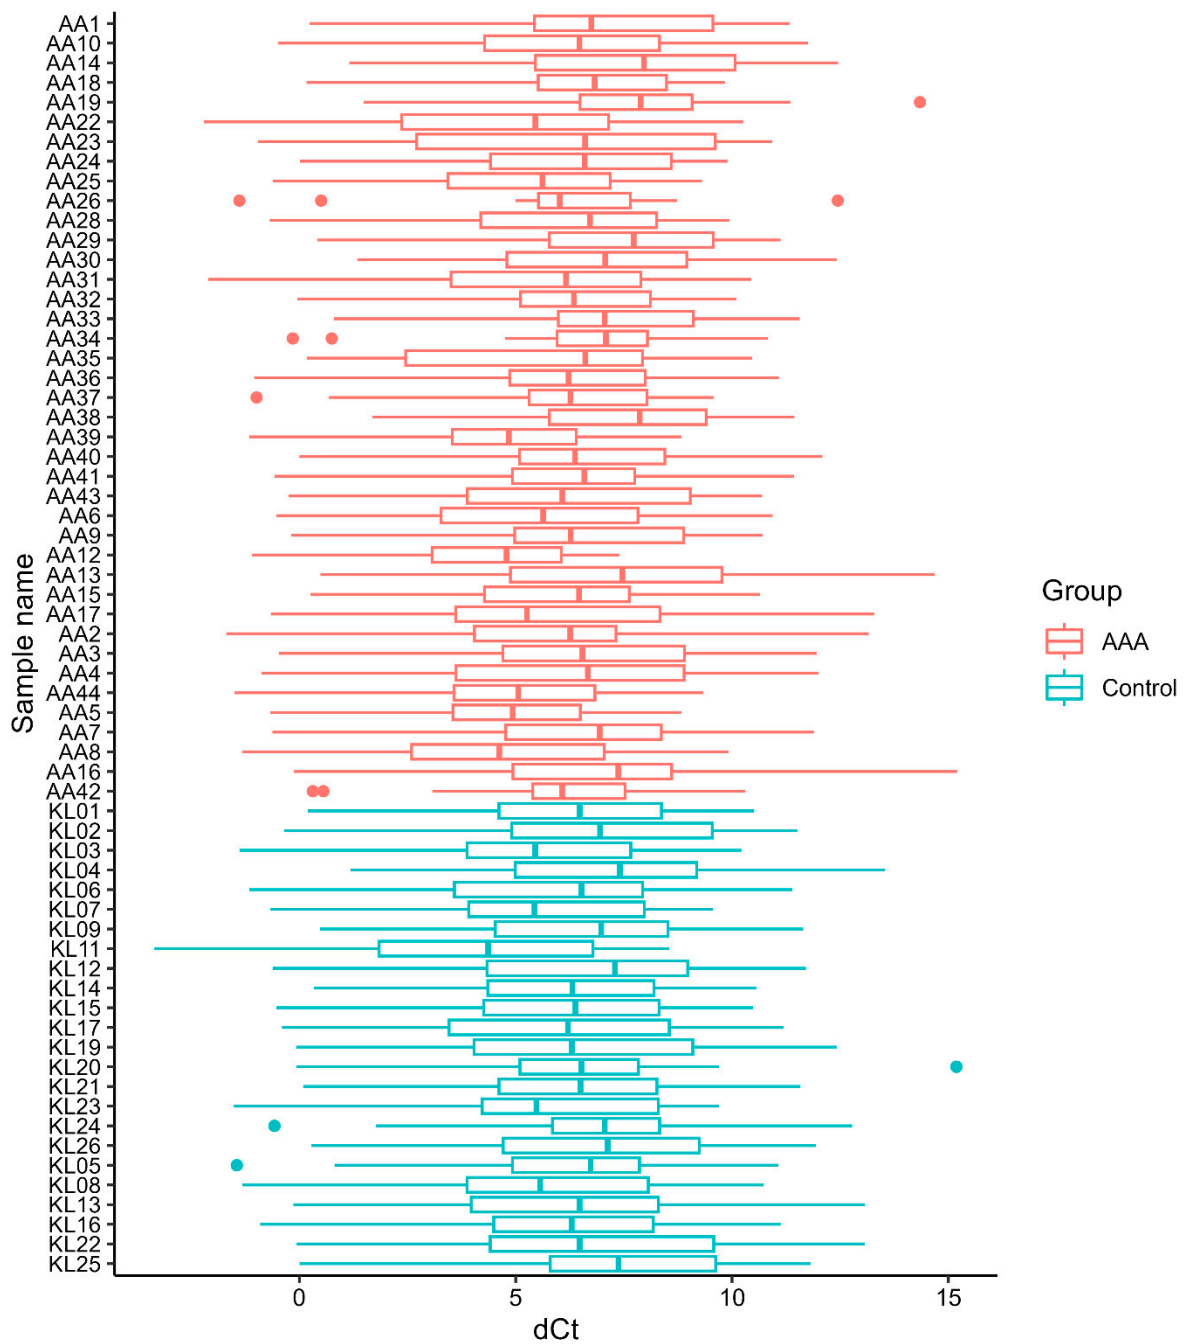

**Figure S2.** Distributions of dCt values in analyzed samples. Whiskers reach the most distant point in doubled interquartile range, boxes range between 25% and 75% quartile, horizontal lines inside boxes mark median value.

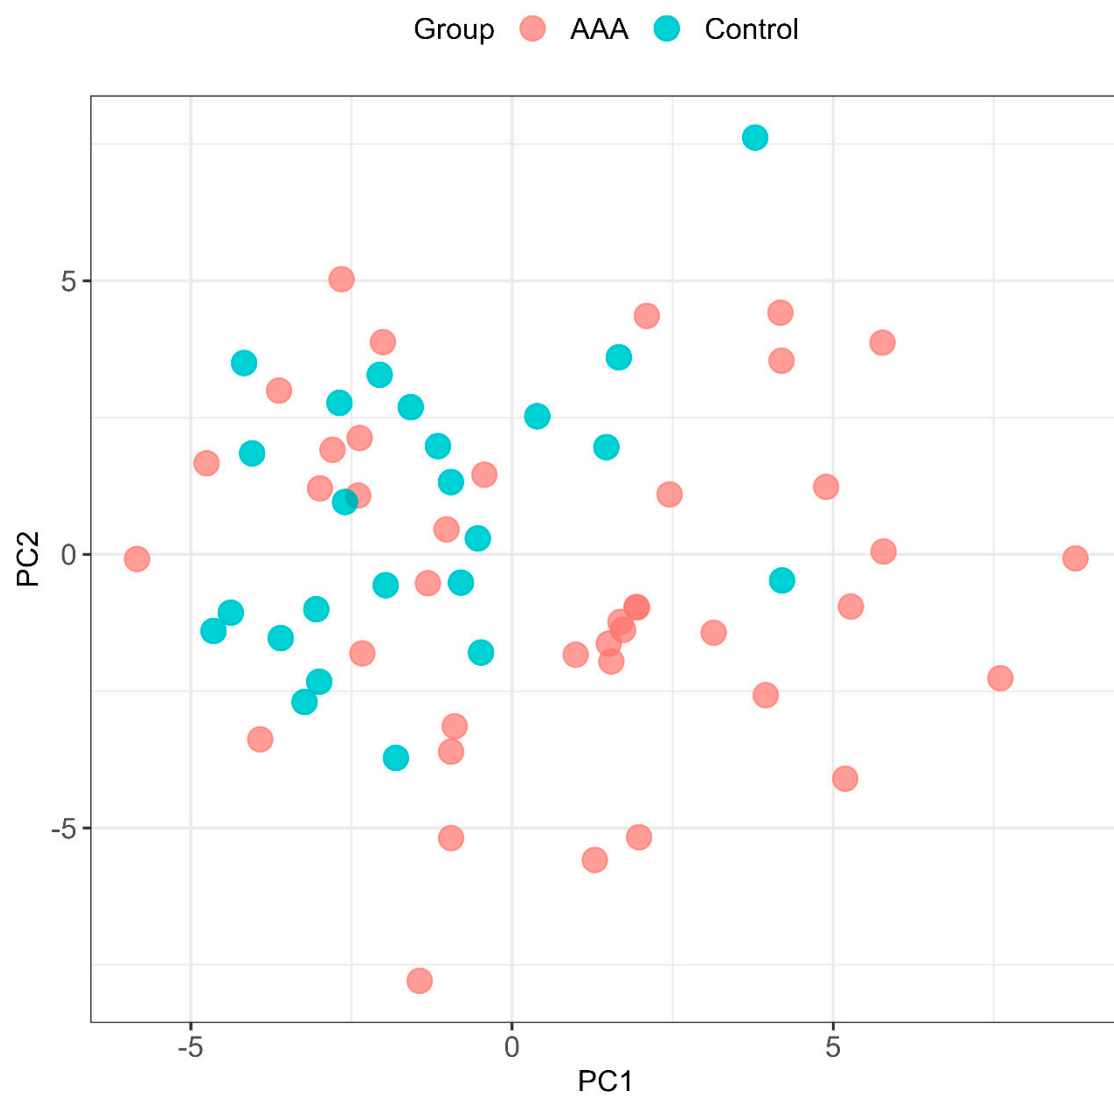

11

12 **Figure S3.** Spatial arrangement of samples using PCA components of dCt data.

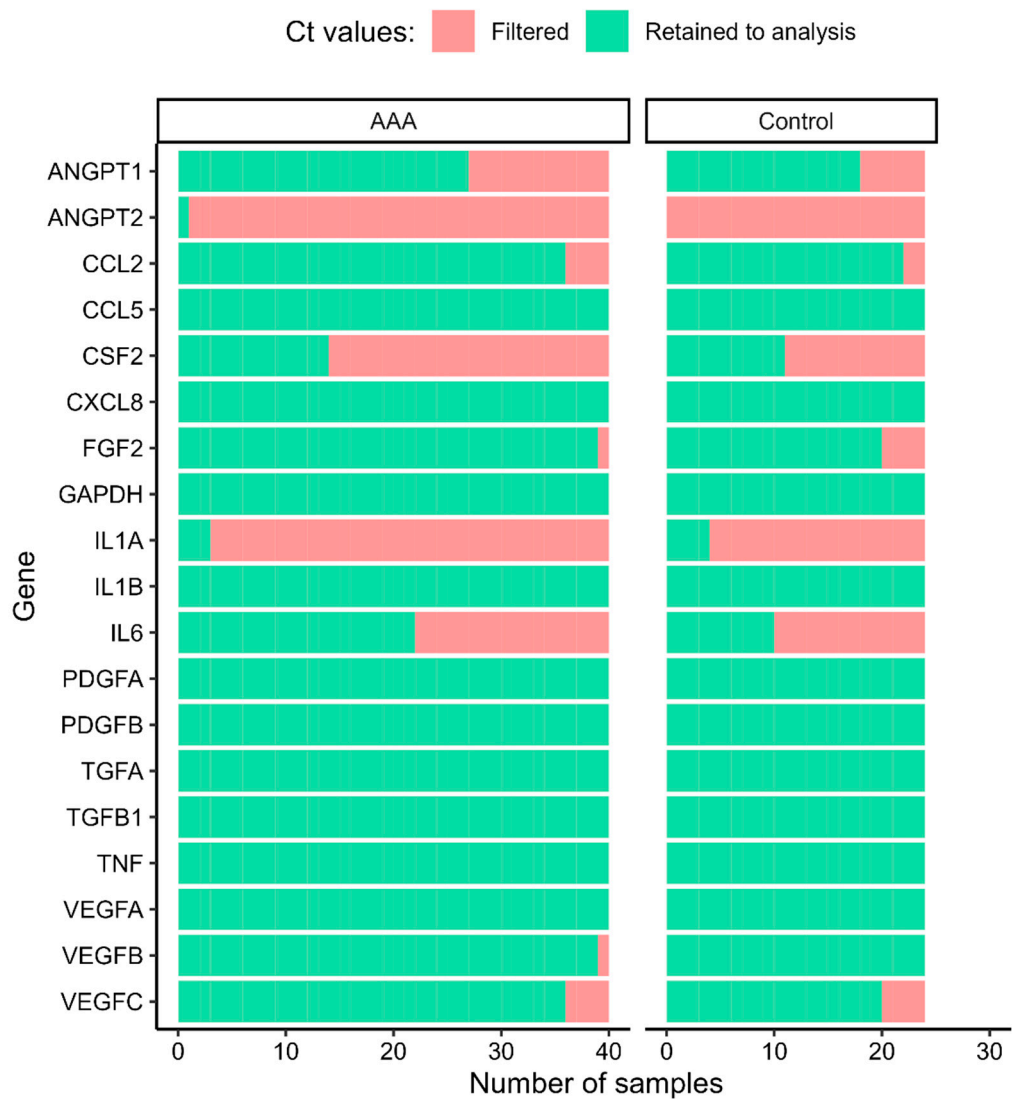

**Figure S4.** The amounts of samples with filtered and retained Ct values.

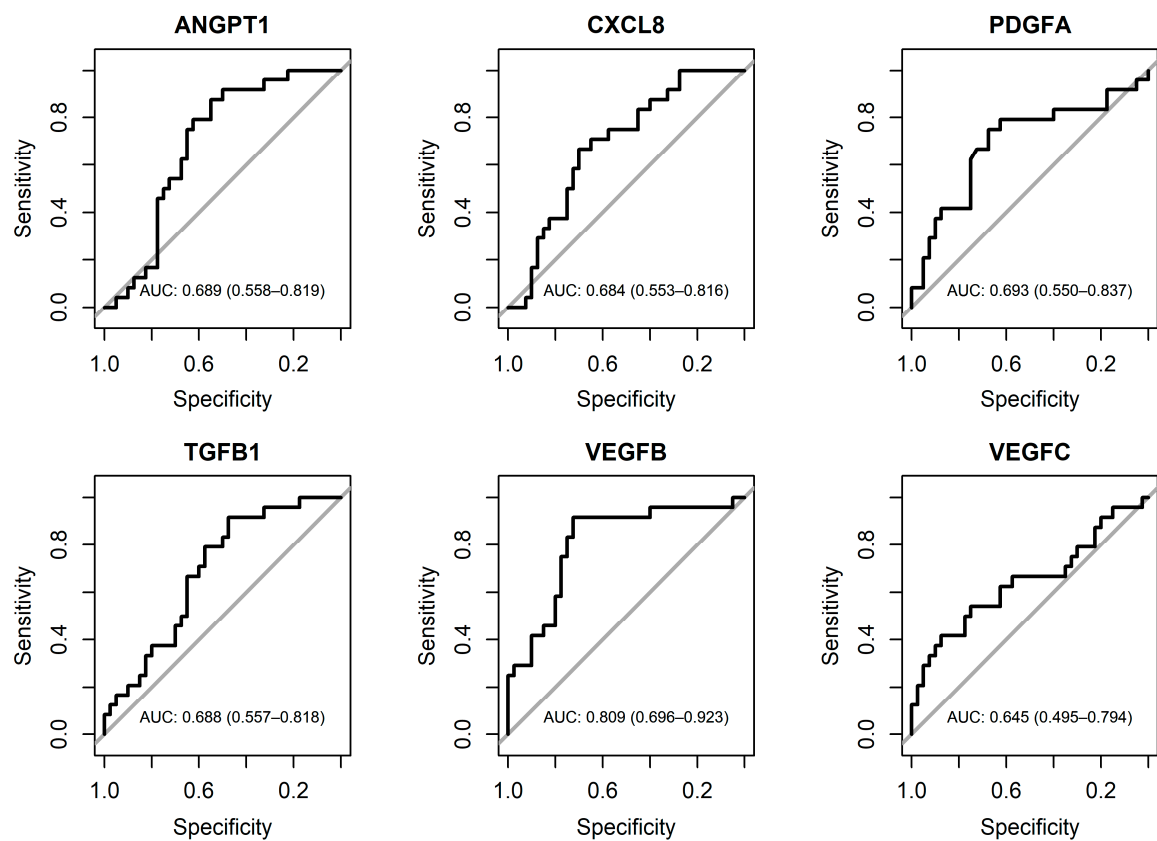

**Figure S5.** Results of Receiver Operating Characteristics (ROC) analysis performed for 6 genes selected from the comparison between AAA and control groups.

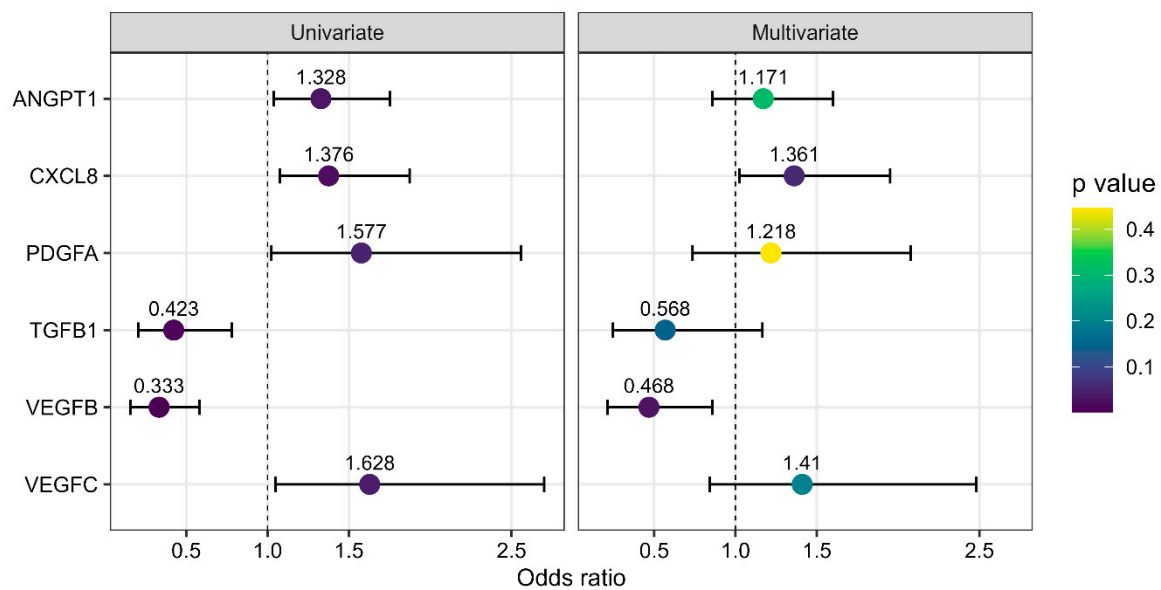

**Figure S6.** Odds ratios and their 95% confidence intervals and *p* values obtained in the univariate and multivariate logistic regression analysis (adjusted by age, sex, BMI, and smoking) for 6 genes selected from AAA vs. control comparison.

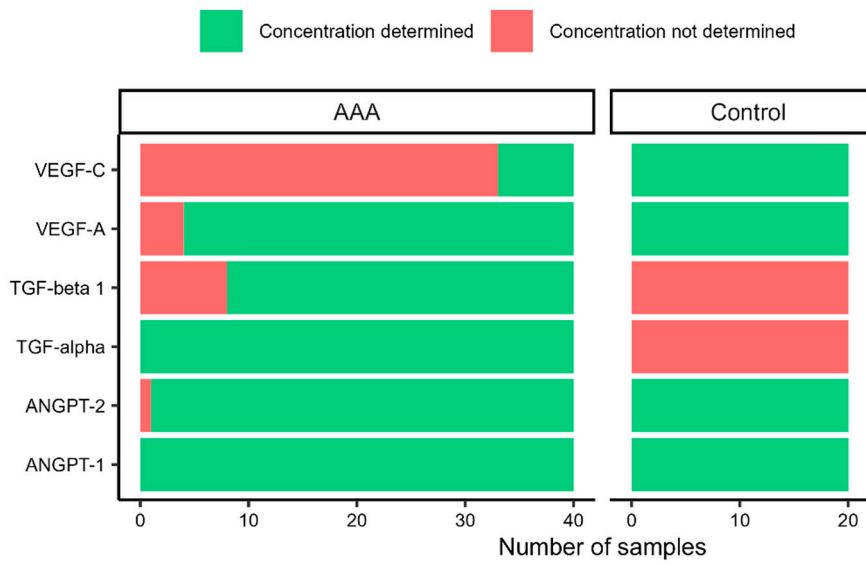

**Figure S7.** Amounts of samples in which plasma levels of analyzed proteins were determined or not.

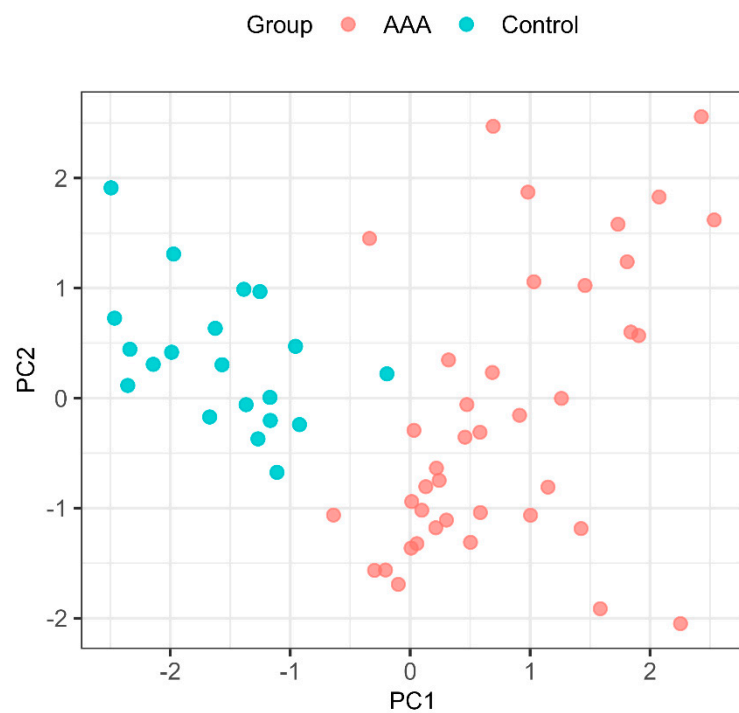

**Figure S8.** Spatial arrangement of samples using PCA components of protein plasma levels data.



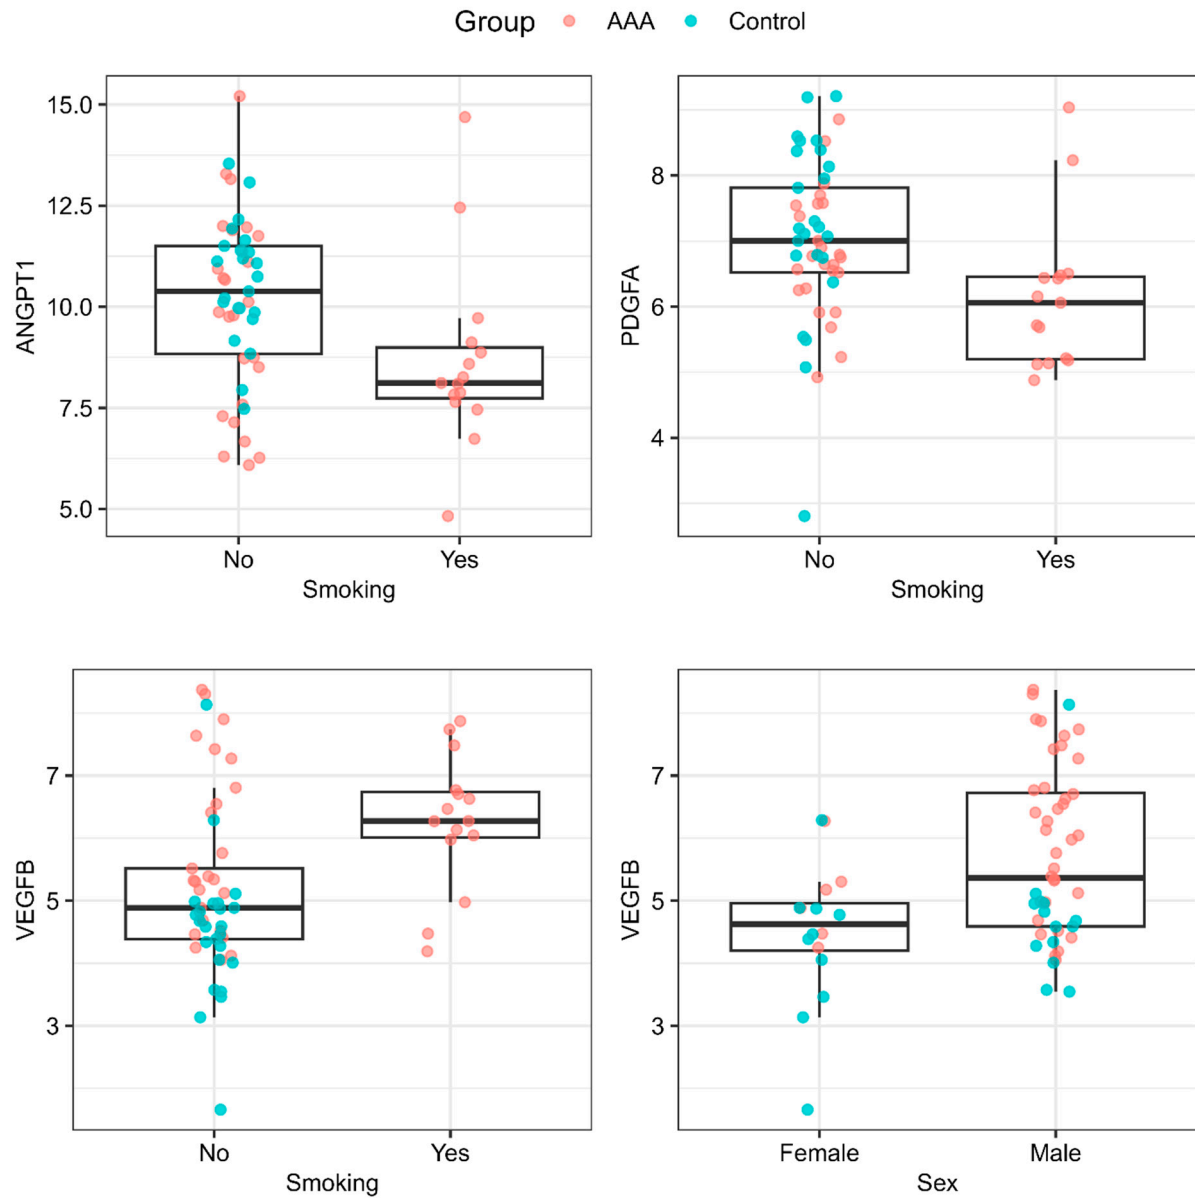

50

51 **Figure S9.** Expression of genes associated with sex and smoking status. Whiskers reach  
 52 the most distant point in 1.5 interquartile range, boxes range between 25% and 75%  
 53 quartile, horizontal lines inside boxes mark median value.

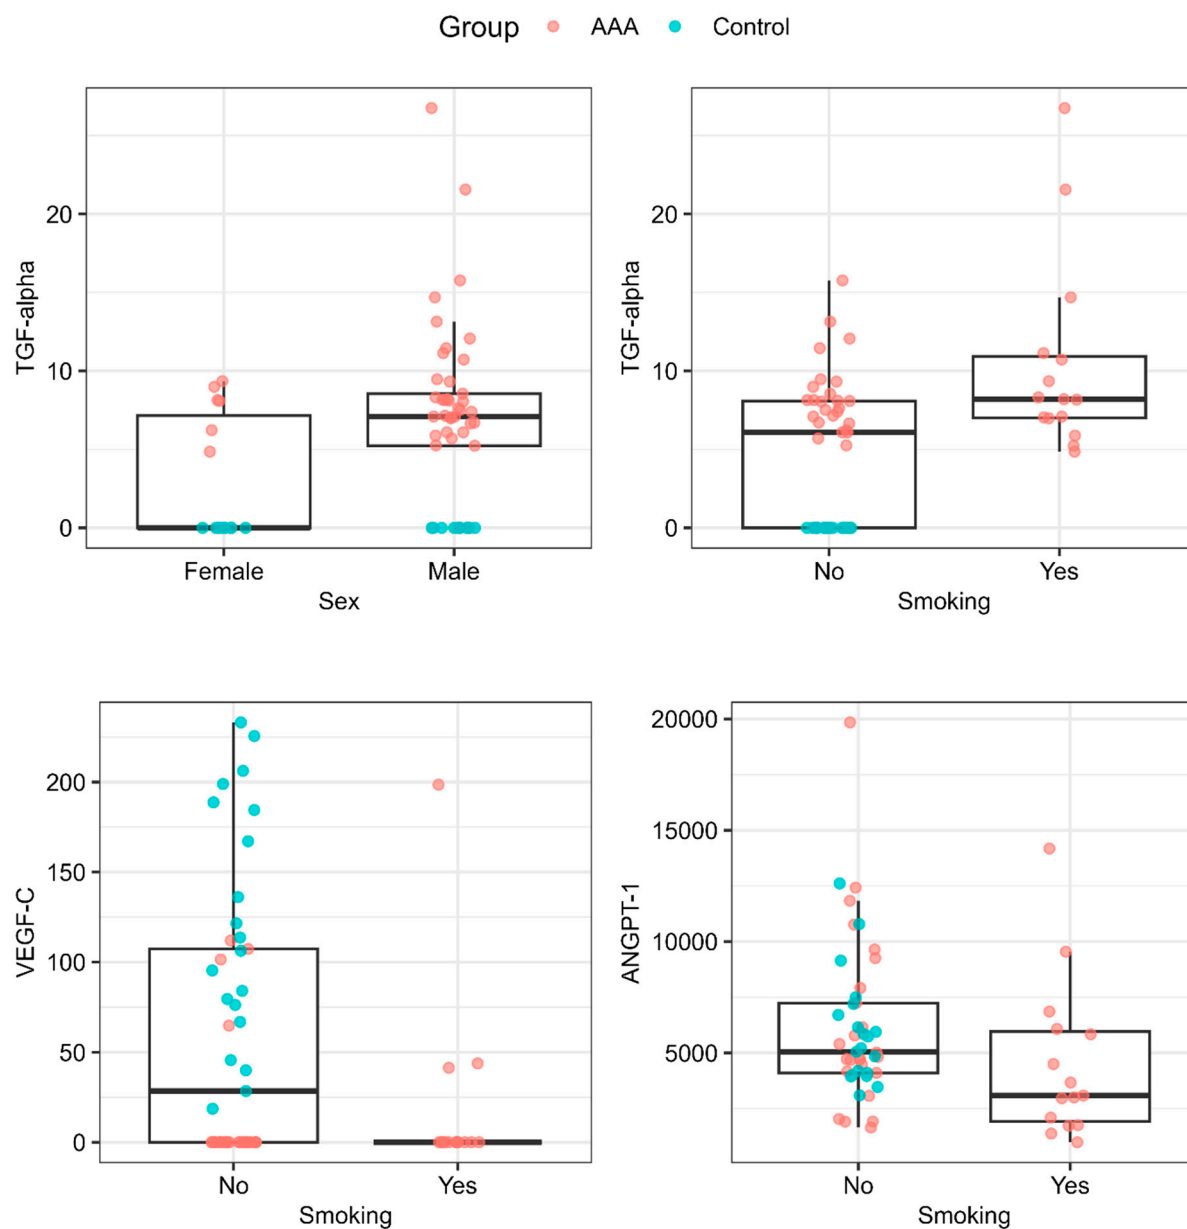

**Figure S10.** Plasma levels of proteins associated with sex and smoking status. Whiskers reach the most distant point in 1.5 interquartile range, boxes range between 25% and 75% quartile, horizontal lines inside boxes mark median value.

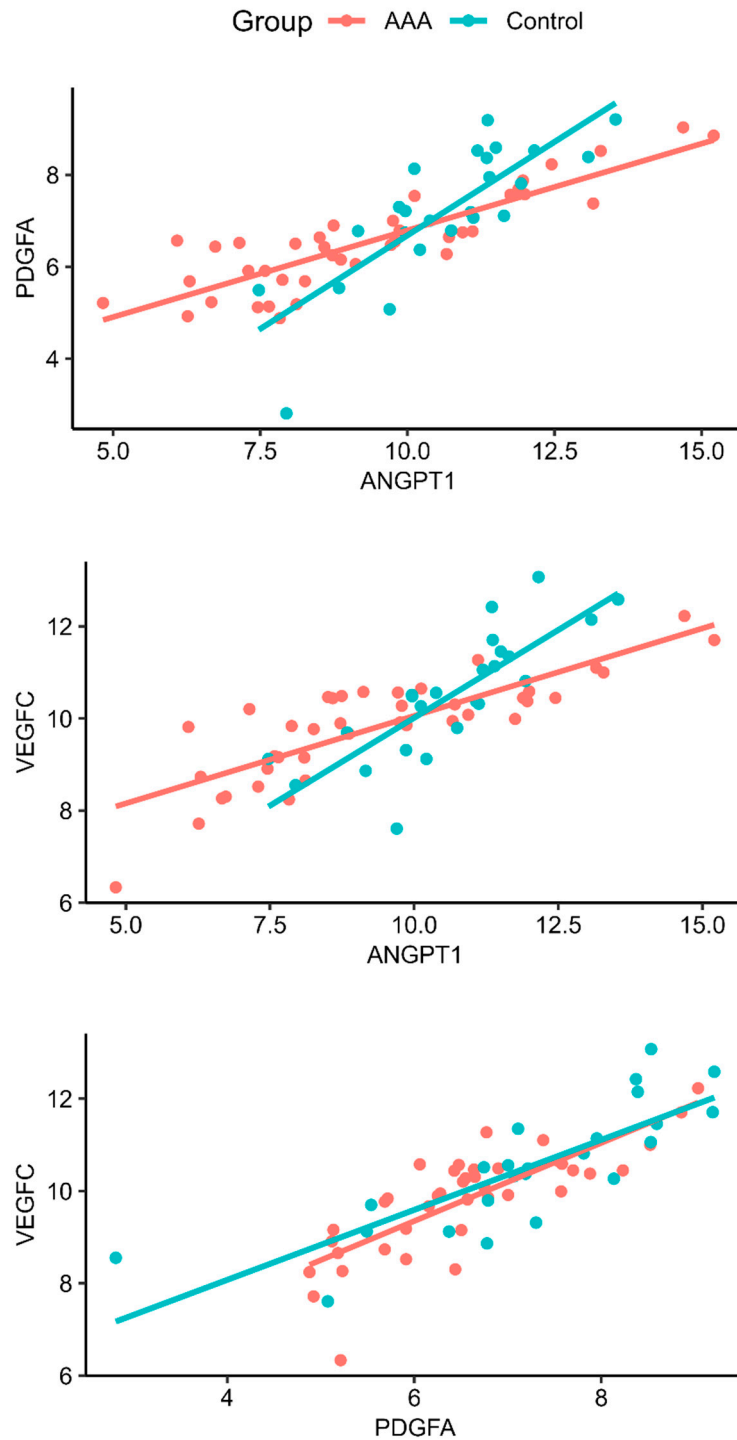

61

62 **Figure S11.** The strongest correlations found between 6 genes selected from the AAA  
 63 vs. control comparison. Lines indicate the trend line (fitting line of the simple linear  
 64 regression model).
