# Supplementary material for: Dysregulations of Key Regulators of Angiogenesis and Inflammation in Abdominal Aortic Aneurysm
Source: Int J Mol Sci. 2023 Jul 28;24(15):12087. doi: 10.3390/ijms241512087 (PMC10418409; doi:10.3390/ijms241512087)
Supplement: Supplementary file 1 [file ijms-24-12087-s001.zip › Supplementary Tables.xlsx]

## Sheet: Table S1
Gene	RQ	p value	test used to calculation of statistical significance
ANGPT1	2.39464	0.0118873	student's t-test
CCL2	1.18223	0.65825	student's t-test
CCL5	1.16795	0.0868356	U Mann Whitney test
CXCL8	3.06862	0.0136027	U Mann Whitney test
FGF2	0.905952	0.644142	student's t-test
IL1B	1.13171	0.611887	student's t-test
PDGFA	1.57067	0.0103022	U Mann Whitney test
PDGFB	0.738136	0.225676	student's t-test
TGFA	0.923425	0.824405	U Mann Whitney test
TGFB1	0.62975	0.00444514	student's t-test
TNF	0.796355	0.226791	student's t-test
VEGFA	0.891887	0.454156	student's t-test
VEGFB	0.365384	1.79304e-05	U Mann Whitney test
VEGFC	1.61014	0.0436783	student's t-test

## Sheet: Table S2
Approach	Gene	Odds ratio	95% confidence interval - lower	95% confidence interval - higher	p value
Univariate	ANGPT1	1.328	1.752	1.039	0.0311369
Univariate	CXCL8	1.376	1.874	1.076	0.0229319
Univariate	PDGFA	1.577	2.559	1.024	0.0488507
Univariate	TGFB1	0.423	0.781	0.204	0.0109937
Univariate	VEGFB	0.333	0.582	0.158	0.000757871
Univariate	VEGFC	1.628	2.701	1.05	0.0402895
Multivariate	ANGPT1	1.171	1.601	0.857	0.311606
Multivariate	CXCL8	1.361	1.951	1.023	0.0563714
Multivariate	PDGFA	1.218	2.078	0.736	0.446761
Multivariate	TGFB1	0.568	1.166	0.247	0.144277
Multivariate	VEGFB	0.468	0.857	0.213	0.0283149
Multivariate	VEGFC	1.41	2.482	0.841	0.204276

## Sheet: Table S3
Gene	Characteristic	correlation coefficient	p value		Protein	Characteristic	correlation coefficient	p value
VEGFB	fibrynogen	-0.338702	0.0061883		Tgfa	CRP	0.525784	1.60284e-05
CXCL8	cholesterol	-0.330326	0.00768037		Tgfb	cholesterol	0.507534	3.48886e-05
VEGFB	cholesterol	0.310814	0.0124278		Vegfc	CRP	-0.505446	3.80289e-05
VEGFB	age	0.28869	0.0206952		Tgfb	CRP	0.399349	0.0015728
VEGFB	homocysteina	0.286956	0.021506		Tgfa	cholesterol	0.353038	0.00566096
ANGPT1	homocysteina	-0.285371	0.0222701		Vegfc	LDL	-0.348786	0.00631051
TGFB1	fibrynogen	-0.272198	0.0295601		Vegfc	cholesterol	-0.348606	0.00633935
TGFB1	age	0.27144	0.0300345		Vegfa	LDL	0.341776	0.00752443
PDGFA	cholesterol	-0.268366	0.0320237		Vegfa	CRP	0.287213	0.0260775
CXCL8	kreatynina	0.268259	0.0320951		Tgfb	fibrynogen	-0.233609	0.0724293
VEGFB	CRP	0.224169	0.0749542		Tgfa	fibrynogen	-0.222705	0.0872054
TGFB1	cholesterol	0.219262	0.0817226		Tgfa	homocysteina	0.221894	0.0883918
CXCL8	fibrynogen	0.218684	0.0825508		Tgfa	LDL	0.215325	0.0984814
TGFB1	homocysteina	0.214183	0.0892288		Vegfa	kreatynina	-0.213034	0.102204
ANGPT1	cholesterol	-0.207706	0.0995752		Angpt1	homocysteina	-0.208934	0.109137
PDGFA	homocysteina	-0.20438	0.105239		Tgfb	mocznik	0.187049	0.152413
VEGFC	homocysteina	-0.185892	0.141378		Vegfa	cholesterol	0.169712	0.194853
TGFB1	LDL	-0.184398	0.144662		Angpt1	LDL	0.165007	0.207701
CXCL8	homocysteina	-0.183297	0.147117		Tgfb	homocysteina	0.151063	0.249265
VEGFB	BMI	0.17291	0.171835		Angpt1	BMI	-0.14725	0.261552
ANGPT1	age	-0.165254	0.191903		Vegfa	mocznik	-0.144555	0.270479
VEGFC	cholesterol	-0.159213	0.208885		Vegfa	fibrynogen	-0.144081	0.272069
PDGFA	CRP	-0.147012	0.246362		Angpt2	homocysteina	-0.132649	0.312325
VEGFC	fibrynogen	-0.14036	0.268624		Vegfc	mocznik	0.12759	0.331303
VEGFC	LDL	-0.127126	0.316812		Angpt2	CRP	-0.118994	0.365169
PDGFA	age	-0.124974	0.325138		Tgfb	LDL	0.113814	0.386559
VEGFB	HDL	-0.124244	0.327997		Tgfb	kreatynina	-0.100785	0.443552
CXCL8	mocznik	-0.119924	0.345224		Vegfc	homocysteina	-0.098162	0.455565
ANGPT1	CRP	-0.119825	0.345622		Tgfa	BMI	0.096393	0.463767
TGFB1	HDL	-0.111799	0.379118		Tgfa	kreatynina	-0.0928693	0.480339
VEGFB	LDL	0.109479	0.389149		Angpt2	cholesterol	-0.0919602	0.484665
TGFB1	kreatynina	-0.109212	0.390315		Angpt2	fibrynogen	-0.090123	0.49347
TGFB1	mocznik	-0.0988768	0.436963		Vegfa	homocysteina	-0.086897	0.50913
CXCL8	CRP	-0.0959841	0.450559		Vegfc	BMI	-0.0857911	0.514556
PDGFA	LDL	-0.0870203	0.494139		Angpt2	mocznik	-0.0845706	0.520579
TGFB1	CRP	0.0762651	0.549194		Angpt2	LDL	0.082477	0.530991
ANGPT1	LDL	-0.0758354	0.551453		Angpt1	fibrynogen	0.0807106	0.539855
CXCL8	BMI	-0.0755564	0.552922		Vegfc	HDL	0.0786978	0.550043
VEGFC	CRP	-0.0676538	0.5953		Angpt1	kreatynina	-0.0760581	0.563543
ANGPT1	BMI	-0.0656883	0.60606		Tgfa	mocznik	-0.0757645	0.565053
PDGFA	fibrynogen	-0.0645682	0.612229		Tgfa	HDL	-0.0700407	0.594882
PDGFA	BMI	-0.063926	0.615778		Vegfc	age	-0.0679929	0.605722
ANGPT1	fibrynogen	-0.0627005	0.622576		Angpt1	age	-0.0647272	0.623184
ANGPT1	HDL	-0.0578777	0.64963		Angpt2	age	0.0597468	0.650212
VEGFC	HDL	-0.0520577	0.682884		Angpt1	cholesterol	-0.0597107	0.65041
TGFB1	BMI	0.0507144	0.690649		Vegfa	HDL	-0.0593325	0.652482
CXCL8	age	-0.0364275	0.775053		Vegfc	kreatynina	0.0548203	0.677398
CXCL8	HDL	0.0348508	0.78455		Vegfa	BMI	0.0463717	0.724968
VEGFC	kreatynina	-0.0328185	0.796837		Angpt2	HDL	0.0383165	0.77131
VEGFC	BMI	-0.0271316	0.831472		Tgfb	age	0.0377249	0.774748
VEGFC	mocznik	-0.0218502	0.863927		Angpt2	kreatynina	-0.0364844	0.781969
CXCL8	LDL	-0.0207866	0.870493		Angpt1	mocznik	-0.0233391	0.859504
PDGFA	kreatynina	0.0177282	0.889418		Tgfb	HDL	-0.0178774	0.892157
VEGFC	age	-0.0153922	0.903914		Tgfb	BMI	0.0174432	0.894761
PDGFA	HDL	-0.0126408	0.92103		Angpt1	CRP	0.0166773	0.899357
ANGPT1	kreatynina	-0.00637564	0.960122		Vegfc	fibrynogen	0.0125754	0.924026
PDGFA	mocznik	-0.00626594	0.960808		Tgfa	age	-0.0107051	0.9353
VEGFB	kreatynina	-0.00208699	0.986942		Vegfa	age	-0.0102839	0.93784
ANGPT1	mocznik	-0.00167549	0.989516		Angpt2	BMI	-0.00391819	0.976297
VEGFB	mocznik	0.000298375	0.998133		Angpt1	HDL	0.00223335	0.986488

## Sheet: Table S4
Gene/protein 1	Gene/protein 2	correlation coefficient	p value
ANGPT1	PDGFA	0.866947	0
PDGFA	VEGFC	0.851387	0
ANGPT1	VEGFC	0.799055	1.9984e-14
TGFB1	VEGFB	0.670297	4.67936e-09
ANGPT1	CXCL8	0.598055	4.51266e-07
Vegfc	Tgfa	-0.545092	6.69275e-06
TGFB1	Angpt1	-0.523312	1.78559e-05
CXCL8	PDGFA	0.48228	9.53827e-05
Vegfc	Tgfb1	-0.478278	0.000111067
VEGFB	Tgfa	0.472772	0.000136536
VEGFB	Angpt1	-0.457183	0.000240446
Tgfa	Tgfb1	0.447166	0.000341061
CXCL8	VEGFB	-0.427174	0.00066412
CXCL8	Tgfa	-0.356568	0.00516716
CXCL8	VEGFC	0.355488	0.00531415
PDGFA	Angpt1	0.354548	0.00544495
ANGPT1	Angpt1	0.352542	0.00573358
CXCL8	TGFB1	-0.352042	0.00580762
PDGFA	Tgfa	-0.344185	0.00708595
ANGPT1	Tgfa	-0.337144	0.00843399
ANGPT1	VEGFB	-0.335315	0.00881875
Vegfa	Tgfa	0.333614	0.00919038
PDGFA	VEGFB	-0.326317	0.0109421
TGFB1	Tgfa	0.321996	0.0121103
Angpt1	Vegfa	0.298629	0.0204674
Angpt2	Vegfa	0.291268	0.0239522
VEGFB	Vegfc	-0.281601	0.0292791
VEGFC	Tgfa	-0.27505	0.0334266
VEGFC	Angpt1	0.26813	0.0383279
VEGFB	Tgfb1	0.264407	0.0412021
Vegfa	Tgfb1	0.247252	0.0568312
Vegfa	Vegfc	-0.232218	0.0741951
CXCL8	Angpt1	0.22623	0.0821904
CXCL8	Tgfb1	-0.220613	0.0902939
PDGFA	Vegfc	0.201055	0.123467
PDGFA	Tgfb1	-0.190847	0.144108
VEGFC	Tgfb1	-0.190185	0.145531
PDGFA	Angpt2	-0.185001	0.157035
ANGPT1	Vegfc	0.183251	0.161066
ANGPT1	Vegfa	0.177576	0.17466
ANGPT1	TGFB1	-0.173715	0.184376
Angpt2	Vegfc	0.167855	0.199853
VEGFC	Vegfc	0.16481	0.208253
ANGPT1	Tgfb1	-0.159758	0.222731
Angpt1	Tgfa	-0.158563	0.226256
Angpt2	Tgfb1	-0.148592	0.257182
Angpt1	Angpt2	-0.145181	0.268385
VEGFB	Angpt2	0.126787	0.334379
TGFB1	Vegfc	-0.124703	0.342449
VEGFC	Angpt2	-0.120174	0.360401
VEGFB	Vegfa	0.118801	0.365953
Angpt1	Vegfc	0.10328	0.43229
VEGFB	VEGFC	-0.102417	0.436166
TGFB1	Tgfb1	0.0994017	0.449865
PDGFA	TGFB1	-0.0993901	0.449918
VEGFC	Vegfa	0.0951243	0.469697
TGFB1	VEGFC	0.0905251	0.491536
ANGPT1	Angpt2	-0.0895817	0.49608
CXCL8	Angpt2	-0.0835799	0.525493
Angpt1	Tgfb1	-0.0815498	0.535635
TGFB1	Vegfa	-0.0783671	0.551726
CXCL8	Vegfa	0.060276	0.647319
CXCL8	Vegfc	0.0424197	0.747593
PDGFA	Vegfa	0.0401706	0.760566
TGFB1	Angpt2	-0.025174	0.848584
Angpt2	Tgfa	0.0117367	0.92908
